# Supplementary material
Source: PubMed Central journal article supplement (PMC6865289)
Supplement: jama-322-1799-s003.pdf [file jama-322-1799-s003.pdf]

## **Data Sharing Statement**

Singh. Association of Cardiac Resynchronization Therapy With Change in Left Ventricular Ejection Fraction in Patients With Chemotherapy-Induced Cardiomyopathy. *JAMA*. Published November 12, 2019. 10.1001/jama.2019.16658

### **Data**

**Data available:** No

### **Additional Information**

**Explanation for why data not available:** Open to the idea of making it available. Have not discussed this in detail amongst steering committee.
